# Supplementary material for: Predictors of mortality of patients newly diagnosed with clinical type 2 diabetes: a 5-year follow up study
Source: Springer Nature journal article supplement (doi:10.1186/1472-6823-10-14), 2010-08-10
Supplement: Additional file 1 [file 1472-6823-10-14-s1.pdf]

**Additional Material** for the paper *“Predictors of mortality of patients newly diagnosed with clinical type 2 diabetes: a 5-year follow up study”* by Niels de Fine Olivarius, Volkert Siersma, Anni B. S. Nielsen, Lars J. Hansen, Lotte Rosenvinge, Carl Erik Mogensen

---

## **Patient questionnaires**

Information about smoking habits, angina pectoris, and intermittent claudication was given in London School of Hygiene questionnaires. The wording of the remaining patient questionnaires is indicated below.

### **Self-rated health**

“In general, how would you rate your health at present?”

- excellent
- good
- fair
- poor
- very poor”

### **Leisure time physical activity**

“Looking back upon the preceding year, what would you say is the best description of your leisure time physical activity?”

- training hard and competition sports regularly and several times a week
- recreational sports or heavy gardening at least 4 hours a week

- walking, bicycling or other light activities at least 4 hours a week (include Sunday excursions, light gardening and bicycling/walking to work)
- reading, watching television or other sedentary activities”

**Cohabitation status**

“Are you living alone?

- yes
- no”

**Education**

“Did you ever receive vocational training?

- yes, describe the training:\_\_\_\_\_
- no”

**Cancer**

“Do you now have or have you formerly had some of the diseases and conditions mentioned below?

...

Cancer:

- yes, I have now, describe:\_\_\_\_\_
- yes, I have formerly had, describe:\_\_\_\_\_
- no, never”
